# Supplementary material for: The Circadian Rhythm Gene Arntl2 Is a Metastasis Susceptibility Gene for Estrogen Receptor-Negative Breast Cancer
Source: PubMed Central journal article supplement (PMC5033489; doi:10.1371/journal.pgen.1006267), 2016-09-22

Supplemental Figure 1

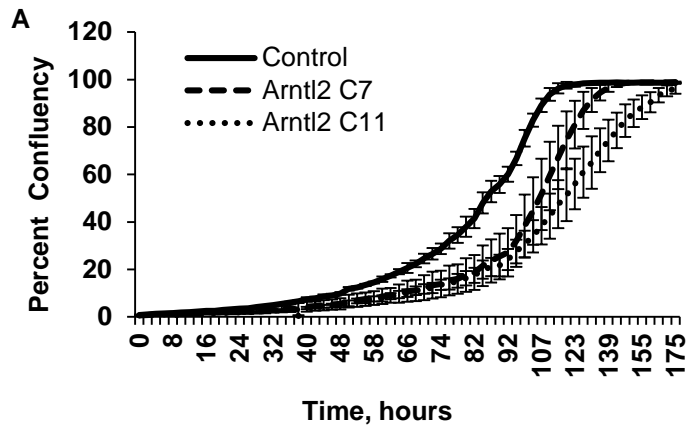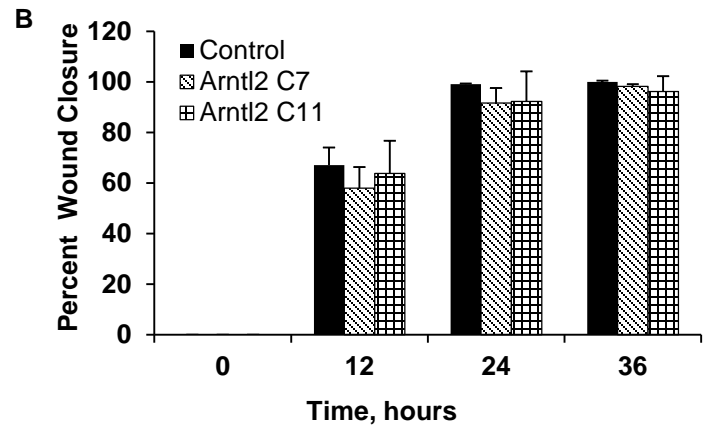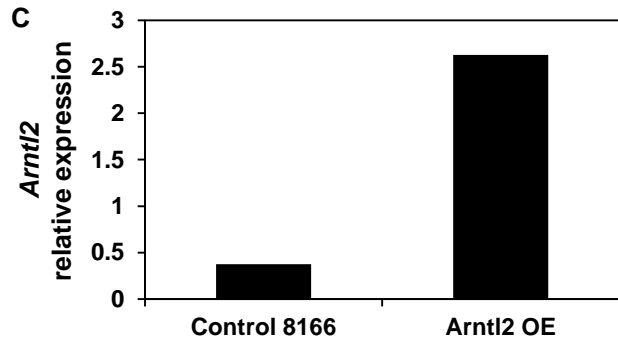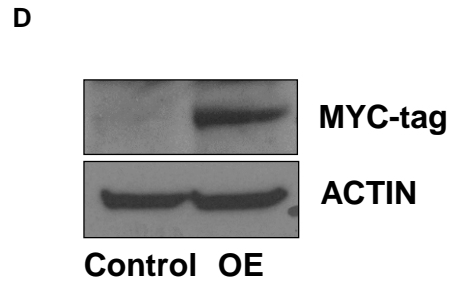

Supplement: pgen.1006267.s001.pdf [file pgen.1006267.s001.pdf]
