# Supplementary material for: The Circadian Rhythm Gene Arntl2 Is a Metastasis Susceptibility Gene for Estrogen Receptor-Negative Breast Cancer
Source: PubMed Central journal article supplement (PMC5033489; doi:10.1371/journal.pgen.1006267), 2016-09-22
Supplement: pgen.1006267.s004.pdf [file pgen.1006267.s004.pdf]

**Supplemental Table 1**

| <b>Gene Symbol</b> | <b>Hazard Ratio</b> | <b>P value</b> |
|--------------------|---------------------|----------------|
| <b>Arntl2</b>      | 0.26                | < 1e-07        |
| <b>2810474O19</b>  | 0.2                 | < 1e-07        |
| <b>4833442J19</b>  | 0.17                | < 1e-07        |
| <b>Clec2g</b>      | 0.03                | < 1e-07        |
| <b>Il17re</b>      | 14.06               | < 1e-07        |
| <b>Fgfr1op2</b>    | 0.13                | < 1e-07        |
| <b>Osbpl3</b>      | 6.2                 | < 1e-07        |
| <b>Clec7a</b>      | 0.12                | < 1e-07        |
| <b>Slco1a5</b>     | 1.8                 | < 1e-07        |
| <b>Pik3c2g</b>     | 0.38                | < 1e-07        |
| <b>Ephb6</b>       | 4.2                 | 7.00E-04       |
| <b>Emp1</b>        | 3.4                 | 0.0011         |
